# Supplementary material for: Optical properties of biomass burning aerosol during the 2021 Oregon fire season: comparison between wild and prescribed fires
Source: Royal Society of Chemistry journal article supplement (doi:10.1039/d2ea00118g), 2023-01-01
Supplement: d2ea00118g1.pdf [file d2ea00118g1.pdf]

*Supplementary Information for:*

## **Optical properties of biomass burning aerosol during the 2021 Oregon fire season: comparison between wild and prescribed fires**

**Andrey Marsavin<sup>1,a</sup>, Ralph van Gageldonk<sup>2</sup>, Noah Bernays<sup>3</sup>, Nathaniel W. May<sup>3</sup>, Daniel A. Jaffe<sup>3,4</sup>, and Juliane L. Fry<sup>1,2</sup>**

<sup>1</sup>Department of Chemistry and Environmental Studies Program, Reed College, Portland, OR, USA

<sup>2</sup>Meteorology and Air Quality Group, Environmental Sciences, Wageningen University, Wageningen, the Netherlands

<sup>3</sup>School of Science and Technology, University of Washington Bothell, Bothell, WA, USA

<sup>4</sup>Department of Atmospheric Science, University of Washington, Seattle, WA, USA

<sup>a</sup>now at: Department of Atmospheric Science, Colorado State University, Fort Collins, CO, USA

**Correspondence:** Juliane L. Fry ([juliane.fry@wur.nl](mailto:juliane.fry@wur.nl)) and Daniel A. Jaffe ([djaffe@uw.edu](mailto:djaffe@uw.edu))

## HYSPLIT back trajectories

HYSPLIT back trajectory plots for each BB event are shown below. The plots were generated in AirNow-Tech Navigator (<https://www.airnowtech.org/navigator/index.cfm>). All trajectories were calculated using 12 km NAM meteorology with a runtime of 24 h. A new trajectory was initiated for each hour during the duration of the event. Trajectories in blue were initiated at 1500 a.m.g.l., while trajectories in green were initiated at 500 a.m.g.l. to reflect upslope flow to MBO (Sect 2.4). Also shown are active fire locations identified by the NOAA Hazard Mapping System (HMS) Fire and Smoke Product (red triangles).

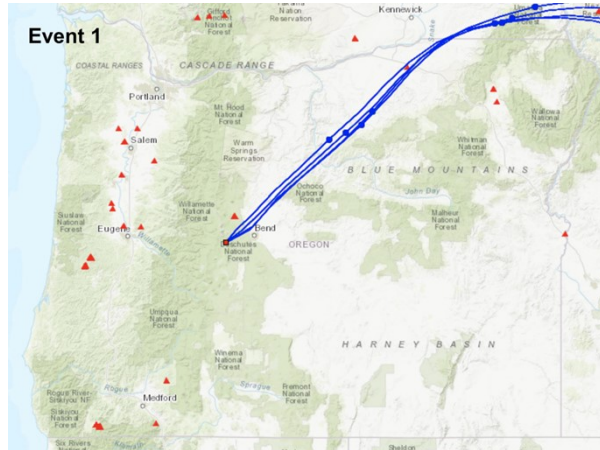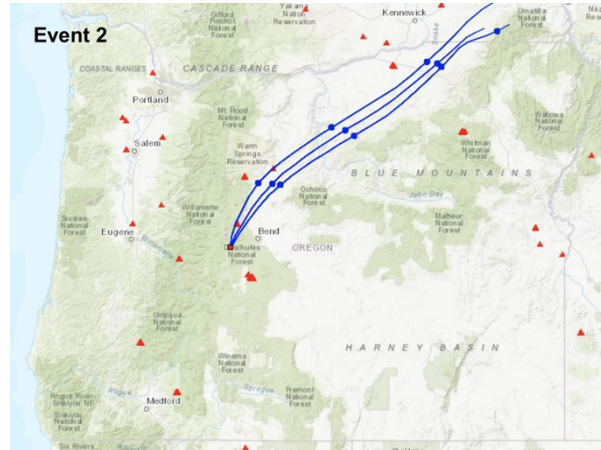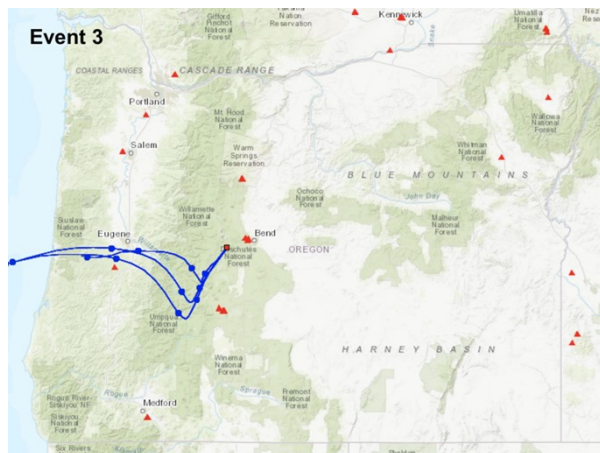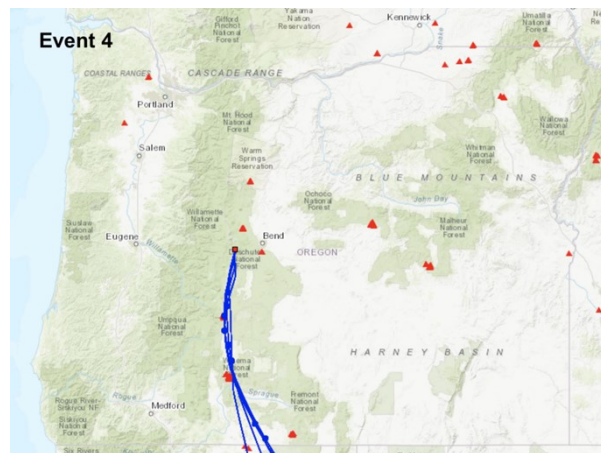

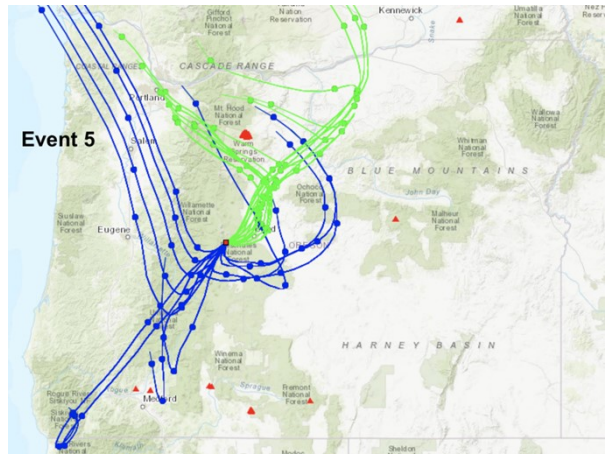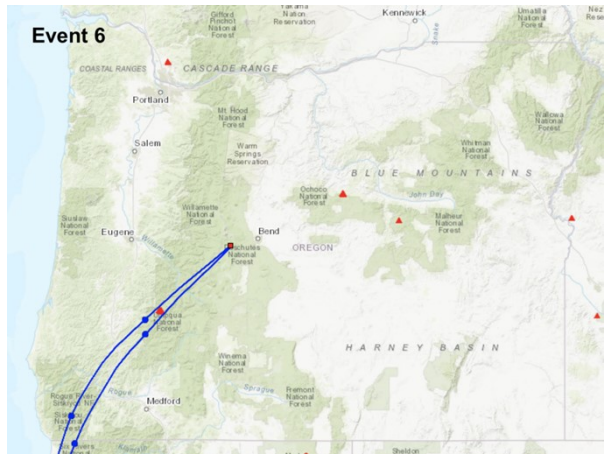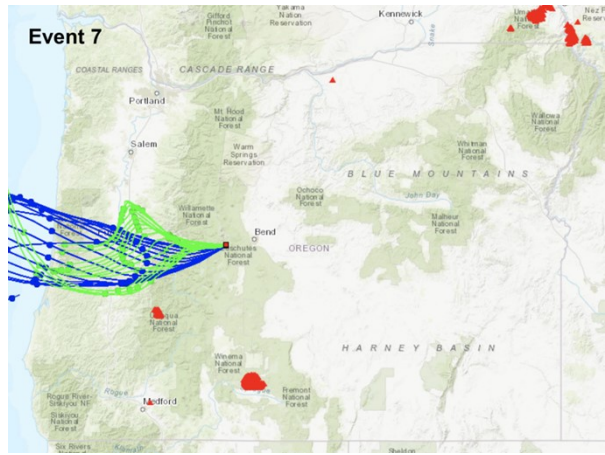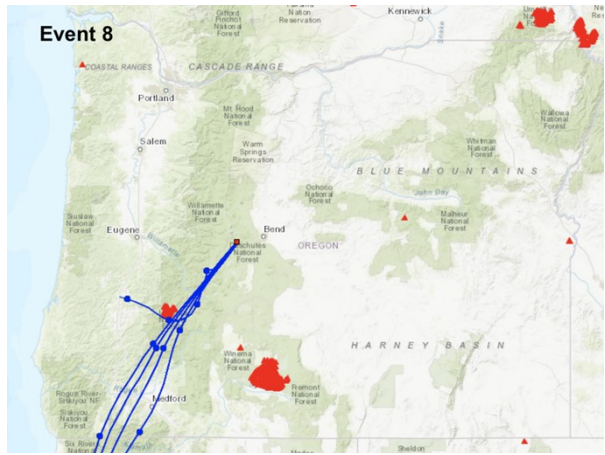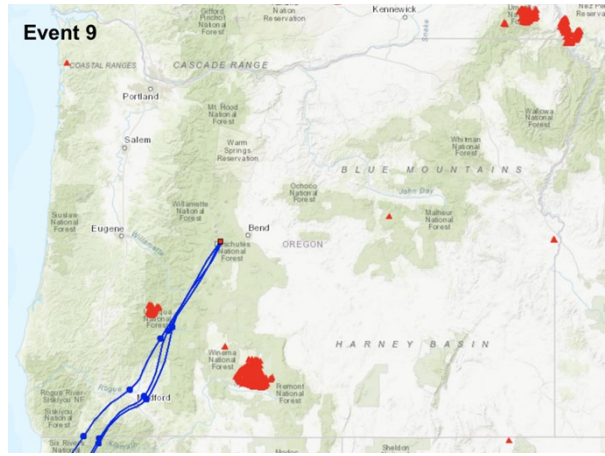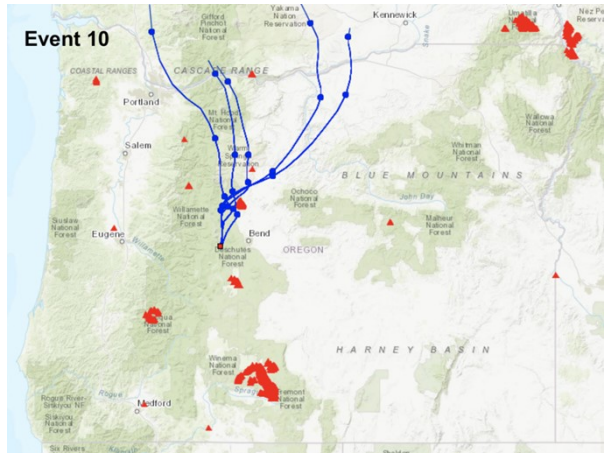

Event 11

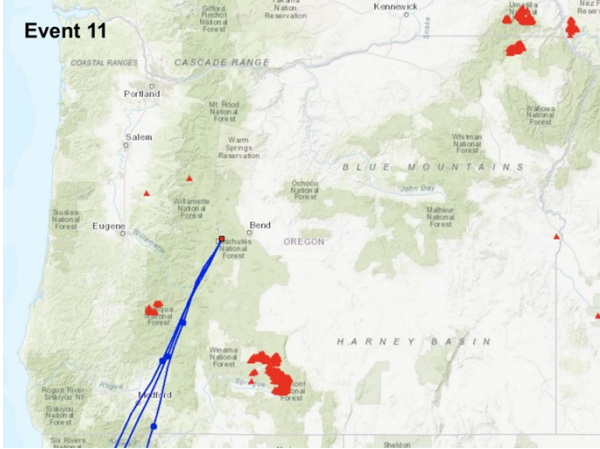

Event 12

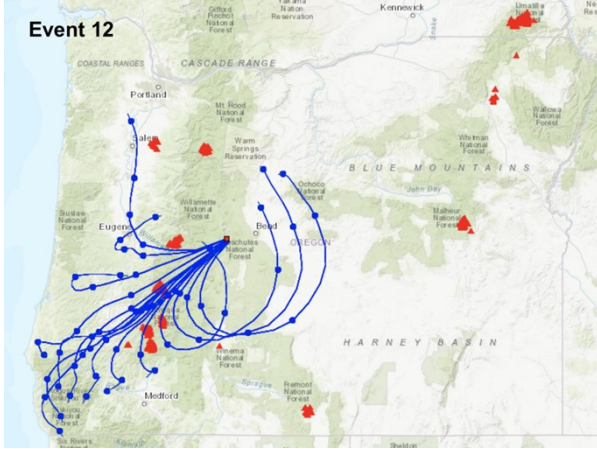

Event 13

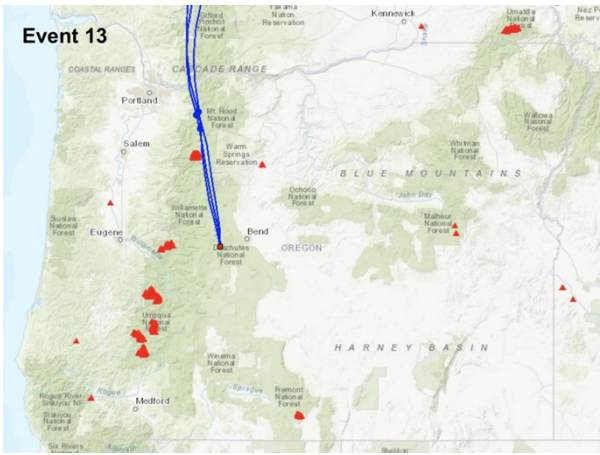

Event 14

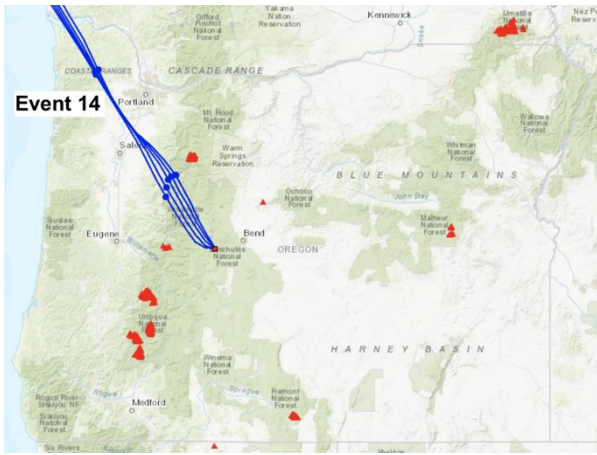

Event 15

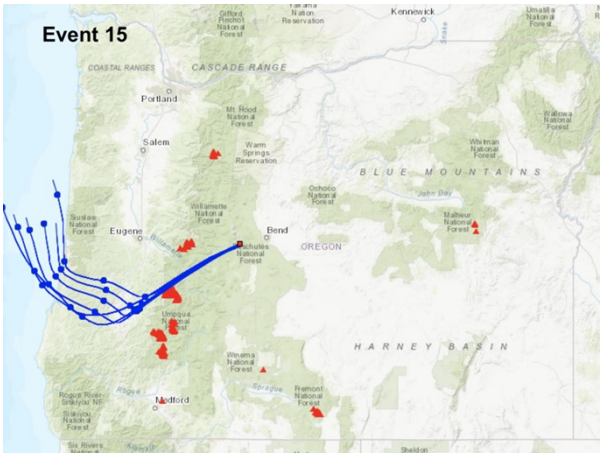

Event 16

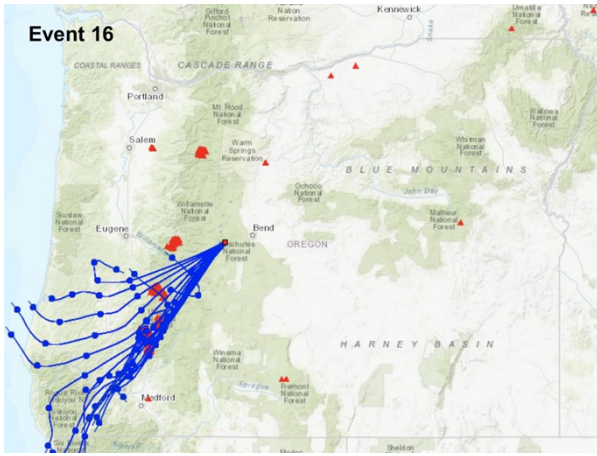

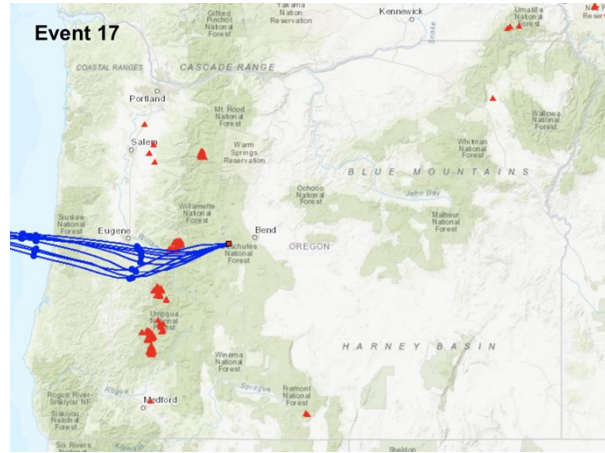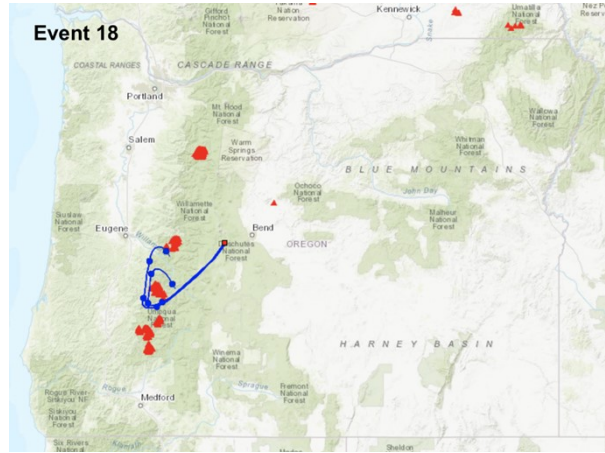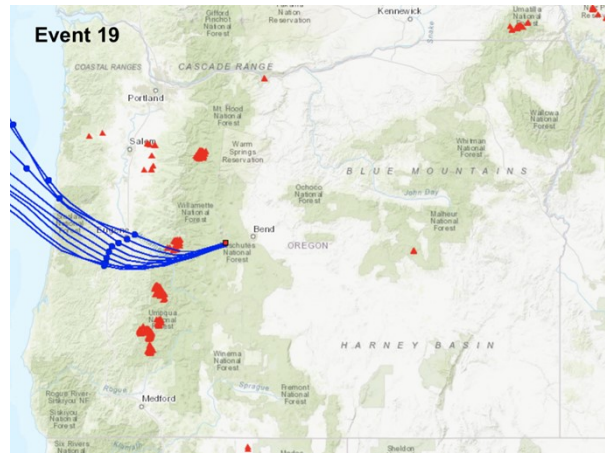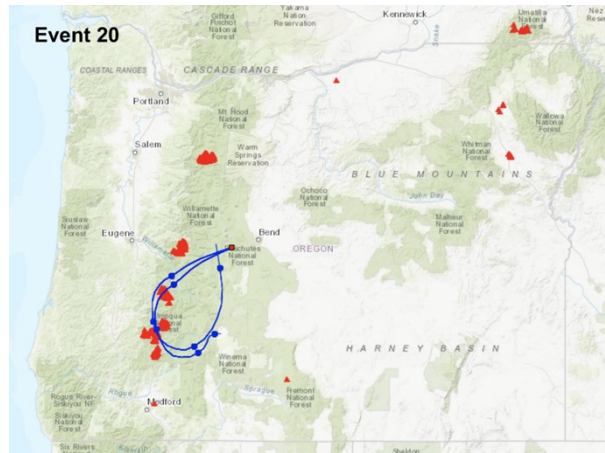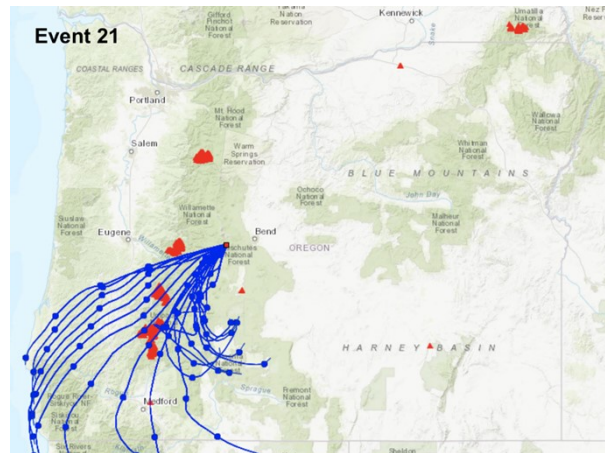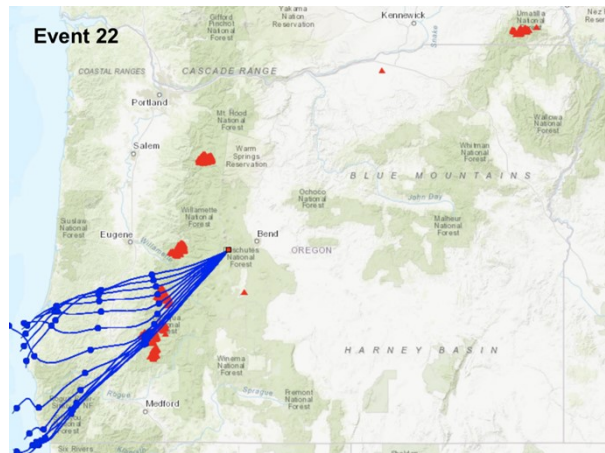

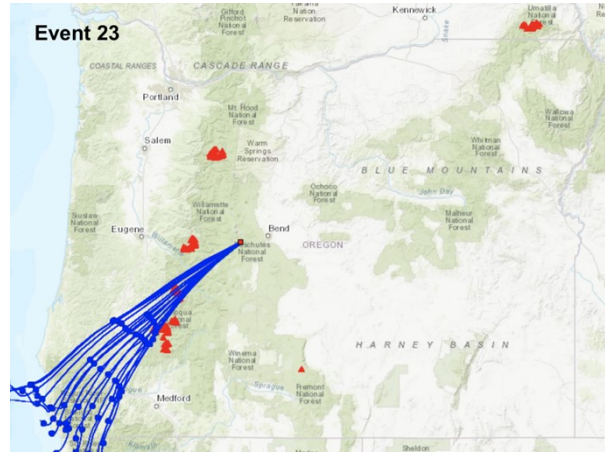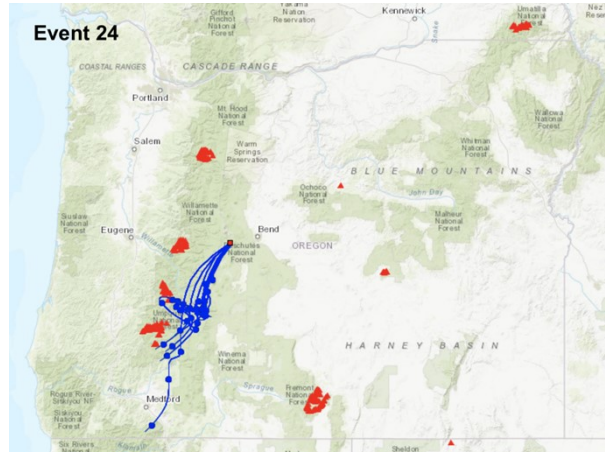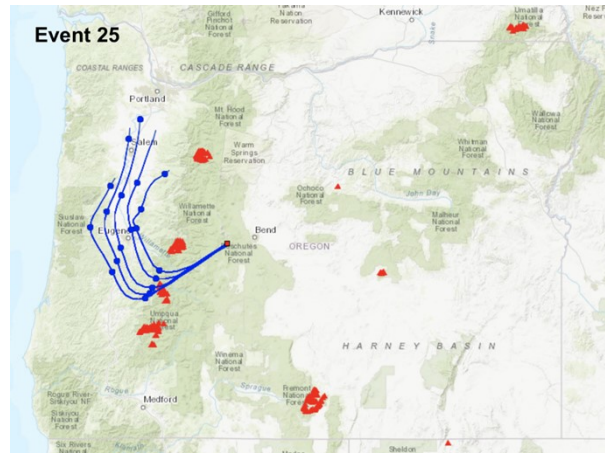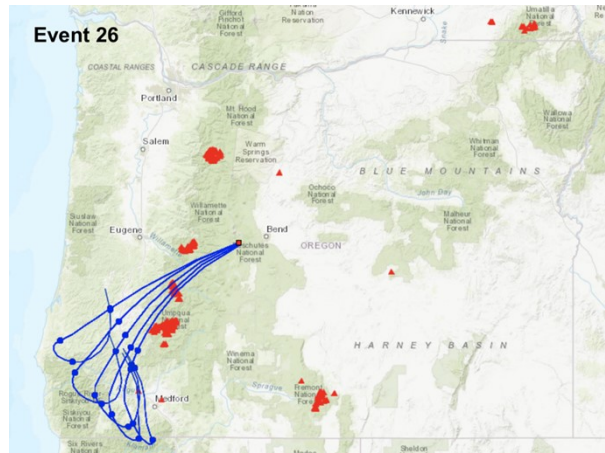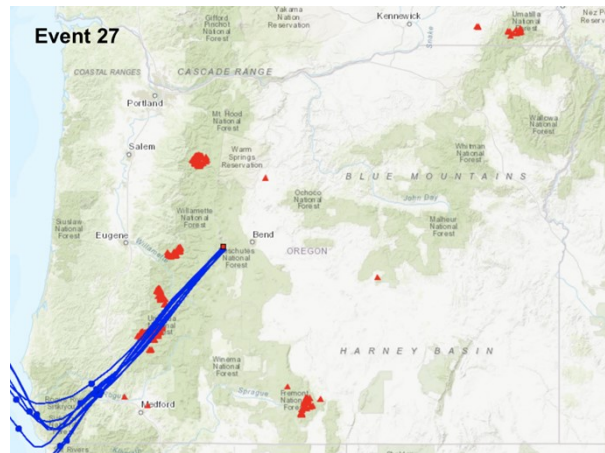

**Table S1.** Calculated aerosol optical properties  $\pm$  precision uncertainty for the 27 BB events listed in Table 1. Events 1–4 are PFs and the rest are WFs. Values in parentheses are total uncertainties. WC (“weak correlation”) in the MSE and MAE columns indicates that the correlation between  $\text{PM}_{10}$  and  $\sigma_{\text{abs}}$  or  $\sigma_{\text{scat}}$  was less than 0.50. ND (“no data”) indicates missing  $\sigma_{\text{abs}}$  data for events 24 and 25. The AAE was not calculated for events marked with ND\* due to low CLAP filter transmittance (see Sect. 2.3).

| Event number | $\Delta\sigma_{\text{scat}550}/\Delta\text{CO}$<br>( $\text{Mm}^{-1}$ ppbv $^{-1}$ ) | $\Delta\sigma_{\text{abs}467}/\Delta\text{CO}$<br>( $\text{Mm}^{-1}$ ppbv $^{-1}$ ) | $\Delta\sigma_{\text{abs}528}/\text{CO}$<br>( $\text{Mm}^{-1}$ ppbv $^{-1}$ ) | $\Delta\sigma_{\text{abs}652}/\Delta\text{CO}$<br>( $\text{Mm}^{-1}$ ppbv $^{-1}$ ) | MSE <sub>550</sub><br>( $\text{m}^2$ g $^{-1}$ ) | MAE <sub>528</sub><br>( $\text{m}^2$ g $^{-1}$ ) | SSA <sub>528</sub>     | AAE <sub>467-652</sub> | SAE <sub>450-550</sub> |
|--------------|--------------------------------------------------------------------------------------|-------------------------------------------------------------------------------------|-------------------------------------------------------------------------------|-------------------------------------------------------------------------------------|--------------------------------------------------|--------------------------------------------------|------------------------|------------------------|------------------------|
| 1            | 1.66 $\pm$ 0.19 (0.30)                                                               | 0.16 $\pm$ 0.02 (0.06)                                                              | 0.12 $\pm$ 0.01 (0.04)                                                        | 0.08 $\pm$ 0.01 (0.03)                                                              | 3.51 $\pm$ 0.39 (0.64)                           | 0.28 $\pm$ 0.03 (0.10)                           | 0.93 $\pm$ 0.01 (0.03) | 2.13 $\pm$ 0.30 (1.75) | 1.75 $\pm$ 0.25 (0.37) |
| 2            | 1.79 $\pm$ 0.20 (0.32)                                                               | 0.17 $\pm$ 0.02 (0.06)                                                              | 0.13 $\pm$ 0.01 (0.04)                                                        | 0.08 $\pm$ 0.01 (0.03)                                                              | 4.38 $\pm$ 0.49 (0.80)                           | 0.32 $\pm$ 0.04 (0.11)                           | 0.94 $\pm$ 0.01 (0.03) | 2.21 $\pm$ 0.31 (1.09) | 1.76 $\pm$ 0.25 (0.37) |
| 3            | 0.89 $\pm$ 0.11 (0.17)                                                               | 0.13 $\pm$ 0.02 (0.05)                                                              | 0.11 $\pm$ 0.01 (0.04)                                                        | 0.08 $\pm$ 0.01 (0.03)                                                              | 3.87 $\pm$ 0.43 (0.70)                           | 0.45 $\pm$ 0.05 (0.16)                           | 0.89 $\pm$ 0.02 (0.05) | 1.66 $\pm$ 0.23 (0.82) | 1.86 $\pm$ 0.26 (0.39) |
| 4            | 1.41 $\pm$ 0.15 (0.25)                                                               | 0.30 $\pm$ 0.03 (0.10)                                                              | 0.24 $\pm$ 0.03 (0.08)                                                        | 0.17 $\pm$ 0.02 (0.06)                                                              | 3.68 $\pm$ 0.41 (0.67)                           | 0.54 $\pm$ 0.06 (0.19)                           | 0.86 $\pm$ 0.03 (0.07) | 1.73 $\pm$ 0.24 (0.86) | 1.92 $\pm$ 0.27 (0.41) |
| 5            | 2.25 $\pm$ 0.25 (0.41)                                                               | 0.27 $\pm$ 0.03 (0.10)                                                              | 0.21 $\pm$ 0.02 (0.07)                                                        | 0.14 $\pm$ 0.02 (0.05)                                                              | 4.03 $\pm$ 0.45 (0.73)                           | 0.41 $\pm$ 0.05 (0.14)                           | 0.91 $\pm$ 0.01 (0.04) | 1.60 $\pm$ 0.23 (0.79) | 1.89 $\pm$ 0.27 (0.40) |
| 6            | 1.00 $\pm$ 0.12 (0.19)                                                               | 0.18 $\pm$ 0.02 (0.06)                                                              | 0.13 $\pm$ 0.02 (0.05)                                                        | 0.07 $\pm$ 0.01 (0.03)                                                              | WC                                               | WC                                               | 0.89 $\pm$ 0.02 (0.05) | 2.74 $\pm$ 0.39 (1.36) | 2.36 $\pm$ 0.33 (0.50) |
| 7            | 1.07 $\pm$ 0.12 (0.19)                                                               | 0.12 $\pm$ 0.01 (0.04)                                                              | 0.08 $\pm$ 0.01 (0.03)                                                        | 0.05 $\pm$ 0.01 (0.02)                                                              | 3.75 $\pm$ 0.42 (0.68)                           | 0.26 $\pm$ 0.03 (0.09)                           | 0.93 $\pm$ 0.01 (0.03) | 2.04 $\pm$ 0.29 (1.01) | 2.13 $\pm$ 0.30 (0.45) |
| 8            | 1.33 $\pm$ 0.16 (0.25)                                                               | 0.16 $\pm$ 0.02 (0.06)                                                              | 0.11 $\pm$ 0.01 (0.04)                                                        | 0.06 $\pm$ 0.01 (0.02)                                                              | WC                                               | WC                                               | 0.93 $\pm$ 0.01 (0.03) | 3.35 $\pm$ 0.47 (1.66) | 2.24 $\pm$ 0.32 (0.48) |
| 9            | 1.16 $\pm$ 0.14 (0.22)                                                               | 0.20 $\pm$ 0.03 (0.07)                                                              | 0.13 $\pm$ 0.02 (0.05)                                                        | 0.07 $\pm$ 0.01 (0.02)                                                              | 4.34 $\pm$ 0.48 (0.79)                           | 0.40 $\pm$ 0.04 (0.14)                           | 0.90 $\pm$ 0.02 (0.05) | 3.29 $\pm$ 0.47 (1.63) | 2.24 $\pm$ 0.32 (0.48) |
| 10           | 0.92 $\pm$ 0.11 (0.17)                                                               | 0.20 $\pm$ 0.03 (0.07)                                                              | 0.16 $\pm$ 0.02 (0.06)                                                        | 0.11 $\pm$ 0.01 (0.04)                                                              | 3.29 $\pm$ 0.37 (0.60)                           | 0.41 $\pm$ 0.05 (0.15)                           | 0.86 $\pm$ 0.03 (0.07) | 1.63 $\pm$ 0.23 (0.81) | 1.94 $\pm$ 0.27 (0.41) |
| 11           | 0.79 $\pm$ 0.09 (0.14)                                                               | 0.07 $\pm$ 0.01 (0.03)                                                              | 0.05 $\pm$ 0.01 (0.02)                                                        | 0.03 $\pm$ 0.00 (0.01)                                                              | 5.07 $\pm$ 0.57 (0.92)                           | 0.34 $\pm$ 0.04 (0.12)                           | 0.94 $\pm$ 0.01 (0.03) | 2.01 $\pm$ 0.28 (0.99) | 2.02 $\pm$ 0.29 (0.43) |
| 12           | 1.19 $\pm$ 0.13 (0.22)                                                               | 0.05 $\pm$ 0.01 (0.02)                                                              | 0.04 $\pm$ 0.00 (0.01)                                                        | 0.02 $\pm$ 0.00 (0.01)                                                              | 6.46 $\pm$ 0.72 (1.18)                           | 0.29 $\pm$ 0.03 (0.10)                           | 0.97 $\pm$ 0.00 (0.01) | 2.32 $\pm$ 0.33 (1.15) | 1.46 $\pm$ 0.21 (0.31) |
| 13           | 1.73 $\pm$ 0.19 (0.31)                                                               | 0.10 $\pm$ 0.01 (0.03)                                                              | 0.10 $\pm$ 0.01 (0.04)                                                        | 0.09 $\pm$ 0.01 (0.03)                                                              | 5.87 $\pm$ 0.66 (1.07)                           | 0.28 $\pm$ 0.03 (0.10)                           | 0.95 $\pm$ 0.01 (0.02) | ND*                    | 1.59 $\pm$ 0.22 (0.34) |
| 14           | 0.76 $\pm$ 0.08 (0.14)                                                               | 0.04 $\pm$ 0.01 (0.01)                                                              | 0.02 $\pm$ 0.00 (0.01)                                                        | 0.02 $\pm$ 0.00 (0.01)                                                              | 3.97 $\pm$ 0.44 (0.72)                           | 0.15 $\pm$ 0.02 (0.05)                           | 0.97 $\pm$ 0.00 (0.01) | ND*                    | 1.56 $\pm$ 0.22 (0.33) |
| 15           | 1.10 $\pm$ 0.12 (0.20)                                                               | 0.06 $\pm$ 0.01 (0.02)                                                              | 0.04 $\pm$ 0.00 (0.01)                                                        | 0.02 $\pm$ 0.00 (0.01)                                                              | 6.00 $\pm$ 0.67 (1.09)                           | 0.21 $\pm$ 0.02 (0.08)                           | 0.97 $\pm$ 0.01 (0.01) | 3.05 $\pm$ 0.43 (1.51) | 1.56 $\pm$ 0.22 (0.33) |
| 16           | 1.15 $\pm$ 0.12 (0.21)                                                               | 0.07 $\pm$ 0.01 (0.02)                                                              | 0.04 $\pm$ 0.00 (0.01)                                                        | 0.02 $\pm$ 0.00 (0.01)                                                              | 5.56 $\pm$ 0.62 (1.01)                           | 0.27 $\pm$ 0.03 (0.1)                            | 0.97 $\pm$ 0.00 (0.01) | 3.11 $\pm$ 0.44 (1.54) | 1.63 $\pm$ 0.23 (0.35) |
| 17           | 1.04 $\pm$ 0.11 (0.19)                                                               | 0.07 $\pm$ 0.01 (0.02)                                                              | 0.05 $\pm$ 0.01 (0.02)                                                        | 0.03 $\pm$ 0.00 (0.01)                                                              | 4.56 $\pm$ 0.51 (0.830)                          | 0.25 $\pm$ 0.03 (0.09)                           | 0.96 $\pm$ 0.01 (0.02) | 2.85 $\pm$ 0.44 (1.41) | 1.93 $\pm$ 0.27 (0.41) |
| 18           | 1.25 $\pm$ 0.15 (0.23)                                                               | 0.10 $\pm$ 0.02 (0.04)                                                              | 0.08 $\pm$ 0.01 (0.03)                                                        | 0.04 $\pm$ 0.01 (0.02)                                                              | 3.99 $\pm$ 0.45 (0.73)                           | 0.33 $\pm$ 0.04 (0.12)                           | 0.94 $\pm$ 0.01 (0.03) | ND*                    | 2.11 $\pm$ 0.30 (0.45) |
| 19           | 1.13 $\pm$ 0.13 (0.21)                                                               | 0.06 $\pm$ 0.01 (0.02)                                                              | 0.03 $\pm$ 0.00 (0.01)                                                        | 0.02 $\pm$ 0.00 (0.01)                                                              | 4.74 $\pm$ 0.53 (0.86)                           | 0.21 $\pm$ 0.02 (0.07)                           | 0.97 $\pm$ 0.00 (0.01) | ND*                    | 1.68 $\pm$ 0.24 (0.36) |
| 20           | 1.37 $\pm$ 0.15 (0.25)                                                               | 0.16 $\pm$ 0.02 (0.06)                                                              | 0.10 $\pm$ 0.01 (0.03)                                                        | 0.04 $\pm$ 0.00 (0.02)                                                              | 5.34 $\pm$ 0.60 (0.97)                           | 0.32 $\pm$ 0.04 (0.11)                           | 0.94 $\pm$ 0.01 (0.03) | 3.77 $\pm$ 0.53 (1.87) | 1.75 $\pm$ 0.25 (0.37) |
| 21           | 1.35 $\pm$ 0.15 (0.24)                                                               | 0.11 $\pm$ 0.02 (0.04)                                                              | 0.08 $\pm$ 0.01 (0.03)                                                        | 0.04 $\pm$ 0.00 (0.02)                                                              | 6.31 $\pm$ 0.71 (1.15)                           | 0.28 $\pm$ 0.03 (0.1)                            | 0.95 $\pm$ 0.01 (0.02) | 2.72 $\pm$ 0.38 (1.35) | 1.55 $\pm$ 0.22 (0.33) |
| 22           | 1.29 $\pm$ 0.14 (0.23)                                                               | 0.09 $\pm$ 0.01 (0.03)                                                              | 0.07 $\pm$ 0.01 (0.03)                                                        | 0.04 $\pm$ 0.00 (0.02)                                                              | 7.42 $\pm$ 0.83 (1.35)                           | 0.39 $\pm$ 0.04 (0.14)                           | 0.95 $\pm$ 0.01 (0.02) | 2.76 $\pm$ 0.39 (1.37) | 1.35 $\pm$ 0.19 (0.29) |
| 23           | 1.30 $\pm$ 0.14 (0.23)                                                               | 0.07 $\pm$ 0.01 (0.03)                                                              | 0.07 $\pm$ 0.01 (0.02)                                                        | 0.05 $\pm$ 0.01 (0.02)                                                              | 6.01 $\pm$ 0.67 (1.09)                           | 0.35 $\pm$ 0.04 (0.12)                           | 0.95 $\pm$ 0.01 (0.02) | ND*                    | 1.57 $\pm$ 0.22 (0.33) |
| 24           | 0.86 $\pm$ 0.09 (0.16)                                                               | ND                                                                                  | ND                                                                            | ND                                                                                  | 4.23 $\pm$ 0.47 (0.77)                           | ND                                               | ND                     | ND                     | 1.80 $\pm$ 0.25 (0.38) |
| 25           | 0.68 $\pm$ 0.07 (0.12)                                                               | ND                                                                                  | ND                                                                            | ND                                                                                  | 4.05 $\pm$ 0.45 (0.74)                           | ND                                               | ND                     | ND                     | 1.81 $\pm$ 0.26 (0.38) |
| 26           | 1.17 $\pm$ 0.13 (0.21)                                                               | 0.11 $\pm$ 0.02 (0.04)                                                              | 0.07 $\pm$ 0.01 (0.03)                                                        | 0.04 $\pm$ 0.00 (0.02)                                                              | 4.17 $\pm$ 0.47 (0.76)                           | 0.27 $\pm$ 0.03 (0.1)                            | 0.94 $\pm$ 0.01 (0.02) | 2.99 $\pm$ 0.42 (1.48) | 1.97 $\pm$ 0.28 (0.42) |
| 27           | 1.04 $\pm$ 0.11 (0.19)                                                               | 0.09 $\pm$ 0.01 (0.03)                                                              | 0.06 $\pm$ 0.01 (0.02)                                                        | 0.03 $\pm$ 0.00 (0.01)                                                              | 3.98 $\pm$ 0.45 (0.72)                           | 0.31 $\pm$ 0.03 (0.11)                           | 0.95 $\pm$ 0.01 (0.02) | 3.12 $\pm$ 0.44 (1.54) | 2.18 $\pm$ 0.31 (0.46) |

**Table S2.** RAVE FRP statistics for the fires sampled at MBO during the 2021 Oregon fire season. The first 4 fires are PFs and the rest are WFs. “Dates active” and “number of days active” columns include days with FRP data; different from official fire start/containment dates. Total fire radiative energy (FRE; the time-integral of FRP) is expressed in terajoules (TJ). Note that burning in the Jack fire area continued after 8/1/21 as part of the Rough Patch Complex.

| Fire                           | East/West slope of Oregon Cascades? | MBO BB event(s) influenced | Coordinates                       | Dates active        | Number of days active | Maximum FRP (MW) | Mean FRP $\pm$ SD (MW) | Median FRP (MW) | Maximum FRP density (MW km <sup>-2</sup> ) | Mean FRP density $\pm$ SD (MW km <sup>-2</sup> ) | Median FRP density (MW km <sup>-2</sup> ) | Total FRE (TJ)    |
|--------------------------------|-------------------------------------|----------------------------|-----------------------------------|---------------------|-----------------------|------------------|------------------------|-----------------|--------------------------------------------|--------------------------------------------------|-------------------------------------------|-------------------|
| PF 1                           | East                                | 1                          | 44.12, -121.71,<br>44.30, -121.50 | 4/14/21–<br>4/16/21 | 3                     | 593              | 174 $\pm$ 176          | 99              | 21.98                                      | 9.10 $\pm$ 5.76                                  | 7.57                                      | 12.54             |
| PF 2                           | East                                | 2                          | 44.12, -121.71,<br>44.30, -121.50 | 4/21/21             | 1                     | 116              | 67 $\pm$ 39            | 71              | 12.88                                      | 7.44 $\pm$ 4.31                                  | 7.85                                      | 0.964             |
| PF 3                           | East                                | 3                          | 43.25, -121.80,<br>43.40, -121.62 | 4/28/21             | 1                     | 358              | 243 $\pm$ 114          | 279             | 16.85                                      | 9.66 $\pm$ 4.23                                  | 8.49                                      | 5.258             |
| PF 4                           | East                                | 4                          | 42.62, -121.92,<br>42.80, -121.71 | 5/4/21–<br>5/6/21   | 3                     | 1042             | 331 $\pm$ 294          | 223             | 27.29                                      | 13.21 $\pm$ 6.55                                 | 11.44                                     | 40.49             |
| S-503                          | East                                | 5                          | 45.02, -121.50,<br>45.20, -121.32 | 6/18/21–<br>6/21/21 | 4                     | 3841             | 949 $\pm$ 998          | 440             | 42.68                                      | 20.86 $\pm$ 10.97                                | 18.66                                     | 198.1             |
| Jack                           | West                                | 6–9, 11                    | 43.19, -122.76,<br>43.37, -122.52 | 7/5/21–<br>7/31/21  | 26                    | 9974             | 696 $\pm$ 1272         | 258             | 110.82                                     | 16.45 $\pm$ 18.42                                | 9.49                                      | 864.1             |
| Grandview                      | East                                | 10                         | 44.33, -121.50,<br>44.54, -121.32 | 7/11/21–<br>7/13/21 | 3                     | 5590             | 1503 $\pm$ 1387        | 1313            | 126.11                                     | 29.31 $\pm$ 24.25                                | 26.15                                     | 286.8             |
| Skyline Ridge Complex          | West                                | 12                         | 42.65, -123.27,<br>42.98, -122.94 | 8/2/21–<br>8/17/21  | 15                    | 2794             | 447 $\pm$ 538          | 270             | 53.19                                      | 13.71 $\pm$ 10.30                                | 11.69                                     | 339.7             |
| Bull Complex                   | West                                | 13, 14                     | 44.72, -122.22,<br>45.02, -121.92 | 8/2/21–<br>9/17/21  | 47                    | 9533             | 667 $\pm$ 1032         | 273             | 105.92                                     | 15.55 $\pm$ 15.39                                | 10.57                                     | 1523              |
| Middle Fork Complex            | West                                | 12, 15–27                  | 43.83, -122.52,<br>44.09, -122.22 | 7/29/21–<br>9/17/21 | 51                    | 4837             | 311 $\pm$ 541          | 125             | 111.88                                     | 9.82 $\pm$ 13.10                                 | 5.98                                      | 500.0             |
| Rough Patch Complex            | West                                | 12, 15–27                  | 43.10, -122.73,<br>43.67, -122.52 | 8/1/21–<br>9/18/21  | 49                    | 14848            | 730 $\pm$ 1543         | 243             | 169.75                                     | 12.08 $\pm$ 18.10                                | 6.88                                      | 1723              |
| Devil’s Knob Complex           | West                                | 12, 15–27                  | 42.80, -122.94,<br>43.22, -122.58 | 8/2/21–<br>9/18/21  | 48                    | 21645            | 1250 $\pm$ 2425        | 421             | 316.39                                     | 15.91 $\pm$ 20.42                                | 10.19                                     | 3681              |
| PF mean $\pm$ SD               |                                     |                            |                                   |                     | 2 $\pm$ 1             | 527 $\pm$ 395    | 204 $\pm$ 111          | 168 $\pm$ 99    | 19.75 $\pm$ 6.25                           | 9.85 $\pm$ 2.43                                  | 8.84 $\pm$ 1.78                           | 14.81 $\pm$ 17.77 |
| WF mean $\pm$ SD               |                                     |                            |                                   |                     | 30 $\pm$ 21           | 9133 $\pm$ 6428  | 819 $\pm$ 399          | 418 $\pm$ 376   | 129.59 $\pm$ 85.47                         | 16.71 $\pm$ 6.04                                 | 12.45 $\pm$ 6.73                          | 1139 $\pm$ 1176   |
| Eastern Cascades mean $\pm$ SD |                                     |                            |                                   |                     | 3 $\pm$ 1             | 1923 $\pm$ 2253  | 545 $\pm$ 563          | 404 $\pm$ 465   | 41.30 $\pm$ 42.82                          | 14.93 $\pm$ 8.52                                 | 13.36 $\pm$ 7.52                          | 90.68 $\pm$ 121.6 |
| Western Cascades mean $\pm$ SD |                                     |                            |                                   |                     | 39 $\pm$ 15           | 10605 $\pm$ 6866 | 684 $\pm$ 322          | 265 $\pm$ 94    | 144.66 $\pm$ 91.88                         | 13.92 $\pm$ 2.58                                 | 9.13 $\pm$ 2.23                           | 1439 $\pm$ 1228   |



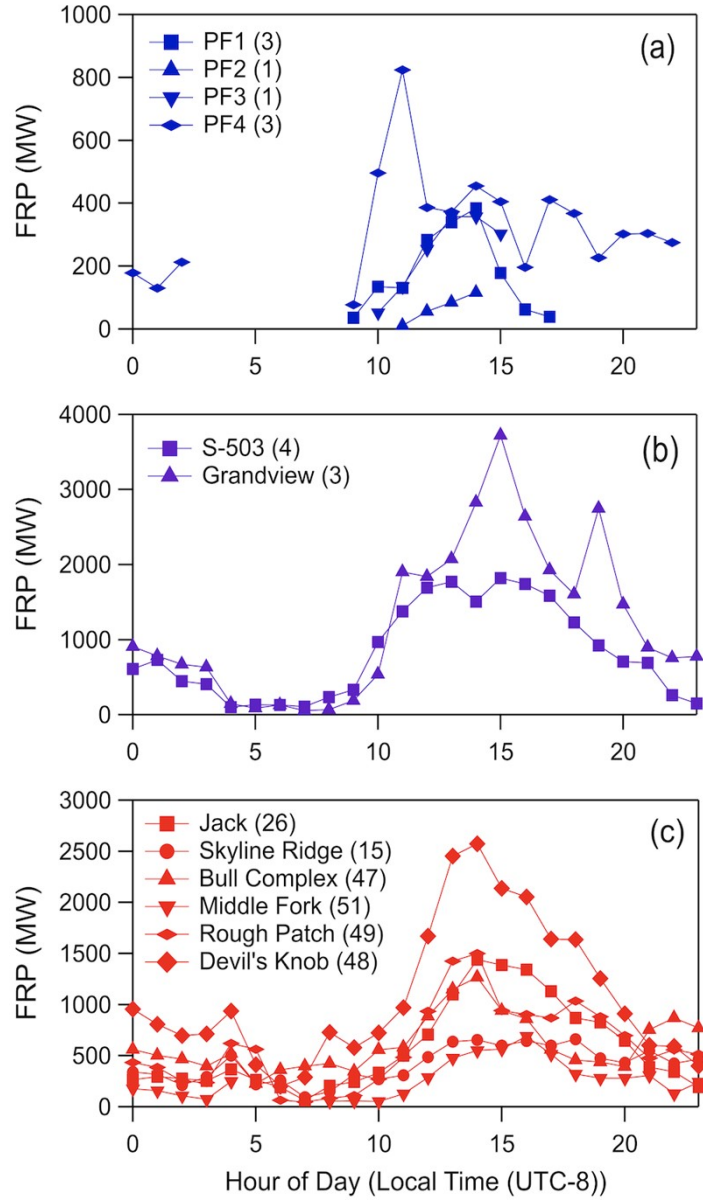

**Figure S1.** Diurnal cycles of RAVE FRP for (a) PFs, (b) eastern Cascades WFs, and (c) western Cascades WFs listed in Table S2. Each point corresponds to the mean FRP for that hour of day across all days with FRP > 0. Values in parenthesis are the number of days with FRP > 0 for each fire.

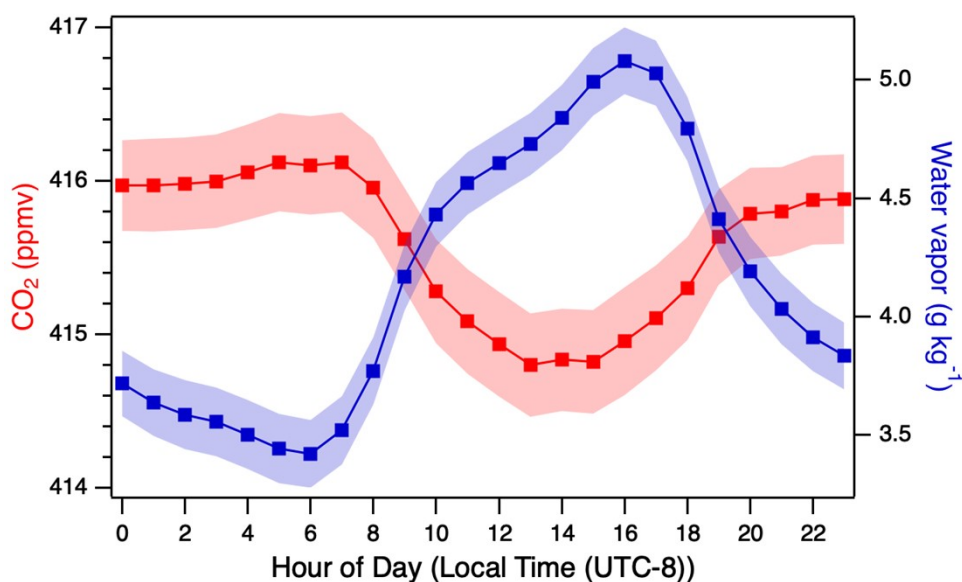

**Figure S2.** Diurnal cycles of CO<sub>2</sub> and water vapor at MBO for the April–September 2021 study period. Water vapor mixing ratio was calculated from relative humidity measurements. Each point corresponds to the mean concentration for that hour of day, and shading shows the standard error of the means. Air during the night is dryer and higher in CO<sub>2</sub> (representative of free troposphere influence). Upslope winds during the daytime bring boundary layer-influenced air (lower in CO<sub>2</sub> and higher in water vapor) up to the observatory.

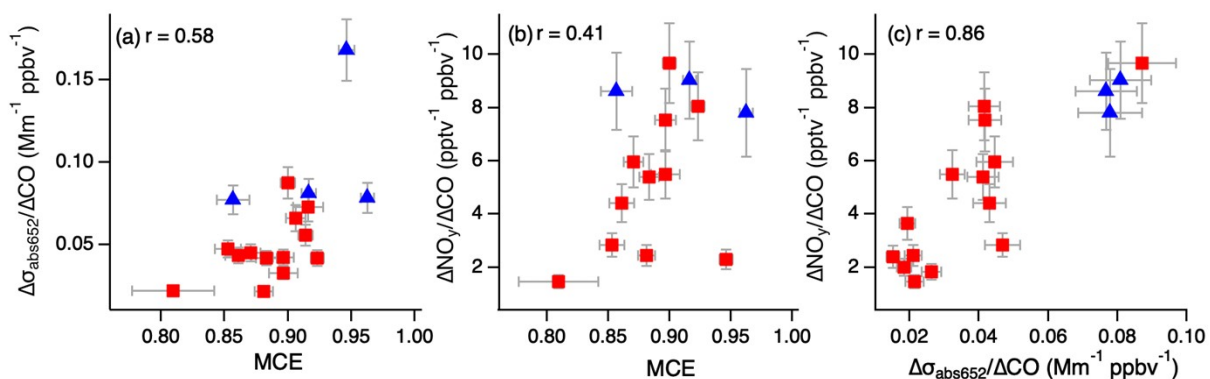

**Figure S3.** Comparison of combustion conditions proxies: (a)  $\Delta\sigma_{\text{abs652}}/\Delta\text{CO}$  as a function of modified combustion efficiency (MCE), (b)  $\Delta\text{NO}_y/\Delta\text{CO}$  as a function of MCE, and (c)  $\Delta\text{NO}_y/\Delta\text{CO}$  as a function of  $\Delta\sigma_{\text{abs652}}/\Delta\text{CO}$ . Error bars show precision uncertainty. Pearson's correlation coefficient ( $r$ ) is included for each relationship. Events are shaped according to their origin in the same way as in Figure 3 in the main text. Note that the two eastern Cascades WF events (Events 5 and 10) are not displayed because no MCE or NO<sub>y</sub> data was available.

**Table S3.** Same as Table 2 in the main text except events are sorted based on ecoregion (eastern vs. western slope of the Oregon Cascades).

|                                                                   | Eastern Cascades events | Western Cascades events | <i>P</i> value |
|-------------------------------------------------------------------|-------------------------|-------------------------|----------------|
| Number of events                                                  | 6                       | 21                      |                |
| Estimated transport time (h)                                      | 6.8 ± 6.5               | 5.1 ± 3.5               | 0.396          |
| ΔPM <sub>1</sub> (μg m <sup>-3</sup> )                            | 81 ± 45                 | 181 ± 129               | 0.075          |
| MCE                                                               | 0.92 ± 0.05             | 0.89 ± 0.03             | 0.159          |
| ΔNO <sub>y</sub> /ΔCO (pptv ppbv <sup>-1</sup> )                  | 6.90 ± 3.20             | 4.18 ± 2.56             | 0.087          |
| ΔPM <sub>1</sub> /ΔCO (μg m <sup>-3</sup> ppbv <sup>-1</sup> )    | 0.28 ± 0.08             | 0.16 ± 0.03             | <0.001         |
| Δσ <sub>scat550</sub> /ΔCO (Mm <sup>-1</sup> ppbv <sup>-1</sup> ) | 1.49 ± 0.52             | 1.13 ± 0.24             | 0.024          |
| Δσ <sub>abs467</sub> /ΔCO (Mm <sup>-1</sup> ppbv <sup>-1</sup> )  | 0.21 ± 0.07             | 0.10 ± 0.05             | <0.001         |
| Δσ <sub>abs528</sub> /ΔCO (Mm <sup>-1</sup> ppbv <sup>-1</sup> )  | 0.16 ± 0.05             | 0.07 ± 0.03             | <0.001         |
| Δσ <sub>abs652</sub> /ΔCO (Mm <sup>-1</sup> ppbv <sup>-1</sup> )  | 0.11 ± 0.04             | 0.04 ± 0.02             | <0.001         |
| SSA <sub>528</sub>                                                | 0.90 ± 0.03             | 0.95 ± 0.02             | 0.001          |
| AAE <sub>467-652</sub>                                            | 1.83 ± 0.27             | 2.86 ± 0.49             | <0.001         |
| SAE <sub>450-550</sub>                                            | 1.85 ± 0.08             | 1.83 ± 0.30             | 0.870          |
| MSE <sub>550</sub> (m <sup>2</sup> g <sup>-1</sup> )              | 3.79 ± 0.39             | 5.04 ± 1.07             | 0.010          |
| MAE <sub>528</sub> (m <sup>2</sup> g <sup>-1</sup> )              | 0.40 ± 0.09             | 0.29 ± 0.07             | 0.004          |
